# Supplementary material for: When Should Lymphadenectomy Be Performed in Non-Metastatic Pancreatic Neuroendocrine Tumors? A Population-Based Analysis of the German Clinical Cancer Registry Group
Source: MDPI journal article supplement (doi:10.3390/cancers16020440), 2024-01-19
Supplement: s1 [file s1]

*Supplementary Materials*

# When Should Lymphadenectomy be Performed in Non-Metastatic Pancreatic Neuroendocrine Tumors? A Population-Based Analysis of the German Clinical Cancer Registry Group

Thaer S. A. Abdalla<sup>1,\*</sup>, Louisa Romina Bolm <sup>1</sup>, Monika Klinkhammer-Schalke <sup>2</sup>, Sylke Ruth Zeißig <sup>2,3</sup>, Kees Kleihues van Tol <sup>2</sup>, Peter Bronsert <sup>4</sup>, Stanislav Litkevych <sup>1</sup>, Kim Christin Honselmann <sup>1</sup>, Rüdiger Braun <sup>1</sup>, Judith Gebauer <sup>5</sup>, Richard Hummel <sup>6</sup>, Tobias Keck<sup>1,\*</sup>, Ulrich Friedrich Wellner <sup>1</sup> and Steffen Deichmann <sup>1</sup>

<sup>1</sup> Department of Surgery, University Medical Center Schleswig-Holstein, Campus Lübeck, Lübeck, Germany

<sup>2</sup> Network for Care Quality and Research in Oncology (ADT), German Cancer Registry Group of the Society of German Tumor Centers, Berlin, Germany

<sup>3</sup> Institute of Clinical Epidemiology and Biometry (ICE-B), University of Würzburg, Würzburg, Germany

<sup>4</sup> Department of Pathology University Medical Center Freiburg, Freiburg, Germany

<sup>5</sup> Department of Internal Medicine I, University Medical Center Schleswig-Holstein, Campus Lübeck, Lübeck, Germany

<sup>6</sup> Department of Surgery, University Medical Center Greiswald, Greifswald, Germany

\* Correspondence: thaer.abdalla@uksh.de (T.S.A.A.); tobias.keck@uksh.de (T.K.)

**Citation:** To be added by editorial staff during production.

Academic Editor: Firstname  
Lastname

Received: 6 December 2023

Revised: 6 January 2024

Accepted: 17 January 2024

Published: 22 January 2024

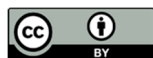

**Copyright:** © 2024 by the authors. Licensee MDPI, Basel, Switzerland. This article is an open access article distributed under the terms and conditions of the Creative Commons Attribution (CC BY) license (<https://creativecommons.org/licenses/by/4.0/>).

Table S1: Risk of LNM according to tumor size, tumor grade and location.

| .Size | Grade | Pancreatic Head | Pancreatic Body/<br>Tail | N          |
|-------|-------|-----------------|--------------------------|------------|
| T1    | G1    | 4.4%            | 1.3%                     | 90 vs. 158 |
| T1    | G2    | 18.2%           | 6.4%                     | 11 vs. 47  |
| T1    | G3    | 100%            | 50%                      | 1. vs. 2   |
| T2    | G1    | 19.5%           | 6.9%                     | 41 vs. 72  |
| T2    | G2    | 34.2%           | 26.2%                    | 38 vs. 61  |
| T2    | G3    | 100%            | 75%                      | 5 vs. 4    |
| T3-4  | G1    | 64%             | 18%                      | 39 vs. 39  |
| T3-4  | G2    | 54.8%           | 51.4%                    | 62 vs. 70  |
| T3-4  | G3    | 57.7%           | 57.1%                    | 26 vs 14   |

Legend: Colors defining different risk of LNM. Green; low-risk (<5%). Yellow; moderate-risk (5-10%). Blue; high-risk (>10%).

Table S2: Frequency of local recurrence and metastasis according to LNM and tumor size

| <i>pNET &lt;2cm</i>                                                                                                   |           |            |          | <i>pNET ≥2cm</i> |            |          |
|-----------------------------------------------------------------------------------------------------------------------|-----------|------------|----------|------------------|------------|----------|
| Variable                                                                                                              | <i>N0</i> | <i>LNM</i> | <i>p</i> | <i>N0</i>        | <i>LNM</i> | <i>p</i> |
| <b>Local recurrence</b>                                                                                               |           |            | 0.646    |                  |            | 0.034    |
| <i>No recurrence</i>                                                                                                  | 380 (99%) | 20 (100%)  |          | 357 (95%)        | 208 (92%)  |          |
| <i>recurrence</i>                                                                                                     | 4 (2%)    | 0 (0%)     |          | 19 (5%)          | 18 (8%)    |          |
| <b>Distant metastasis<br/>(Progression)</b>                                                                           |           |            | <0.031   |                  |            | <0.001   |
| <i>No distant metastasis</i>                                                                                          | 318 (97%) | 14 (87%)   |          | 246 (81%)        | 118 (62%)  |          |
| <i>Distant metastasis</i>                                                                                             | 9 (3%)    | 2 (13%)    |          | 58 (19%)         | 67 (37%)   |          |
| Legend: <i>p</i> according to the $\chi^2$ test when comparing patients with and without lymph node metastasis (LNM). |           |            |          |                  |            |          |

Figure S1: Flow Chart

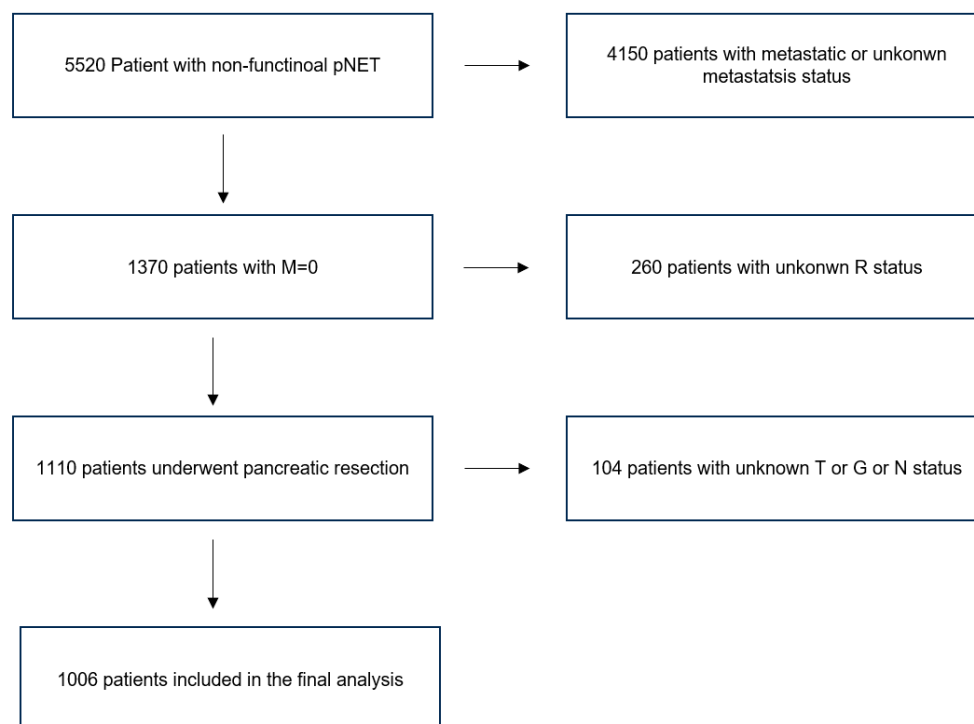

Figure S2: Kaplan-Meier Plot for disease-free survival according to the presence of lymph node metastasis stratified by the T-stage in patients with pNET.

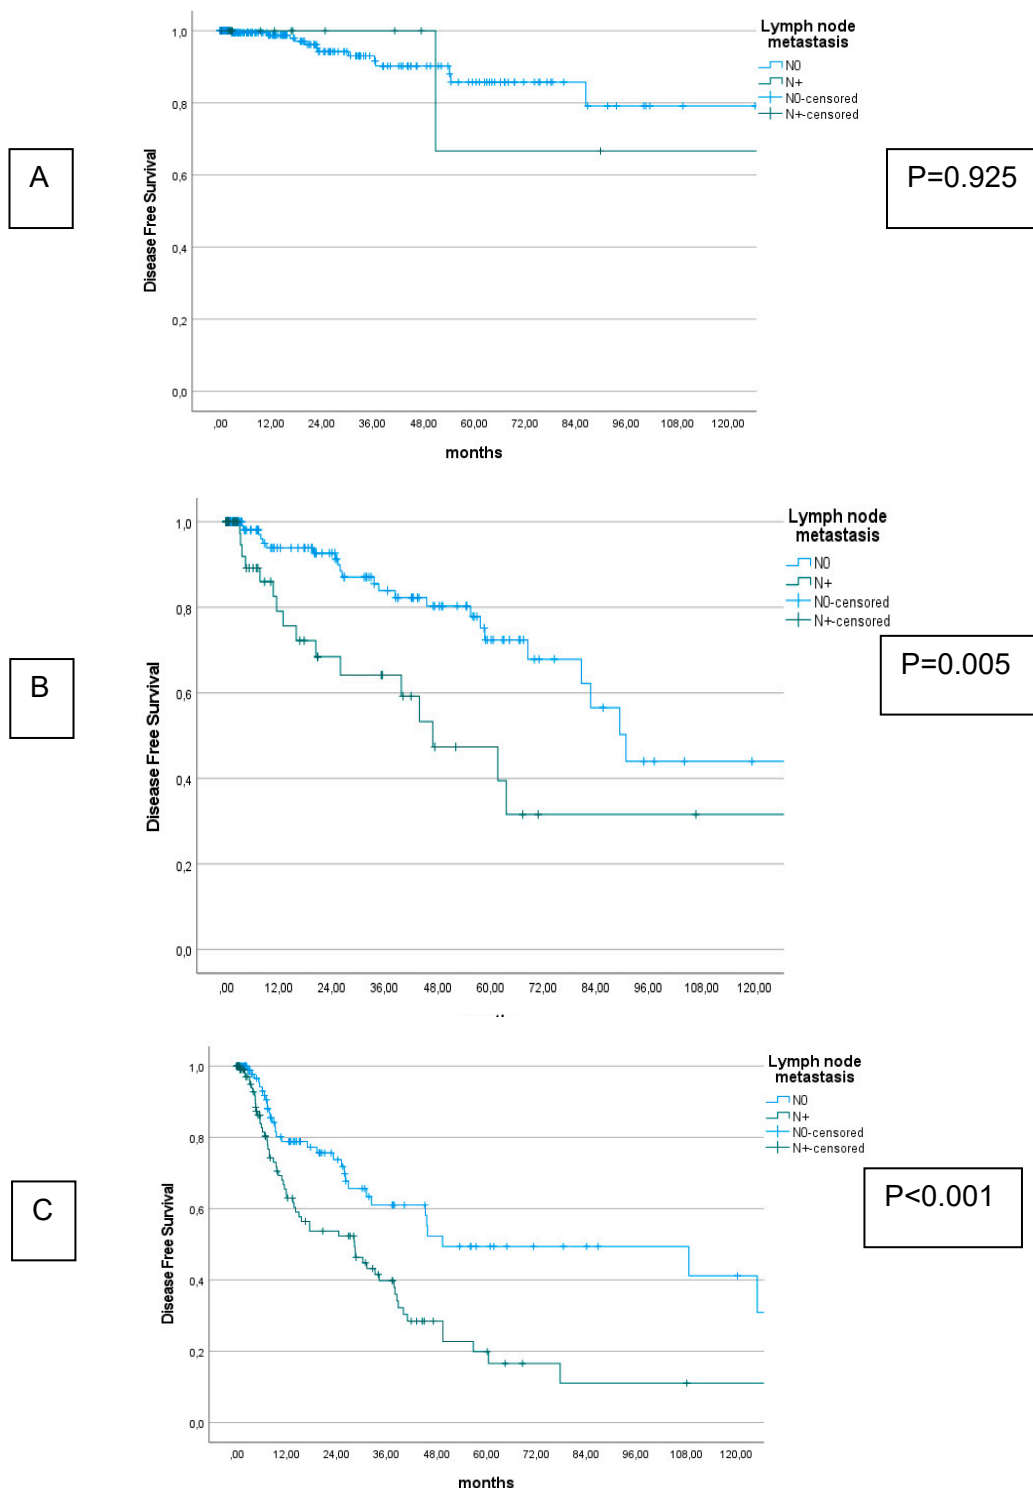

Legend: P according to Log-Rank Test, Figure A; T1 Tumors, Figure B; T2 Tumors, Figure C; T3-T4 Tumors.
